# Supplementary material
Source: MDPI journal article supplement (https://www.mdpi.com/2076-3417/13/5/3358)
Supplement: s1 [file s1]

Table S1. Relative area of volatile compounds in SJ and DSJ

| Volatile compounds                              | SJ             | DSJ          |
|-------------------------------------------------|----------------|--------------|
| Allyl isothiocyanate                            | 10.56 ± 0.44a  | 3.88 ± 0.08b |
| Ethanol                                         | 15.84 ± 0.37   | n.d.         |
| Acetic acid                                     | 22.97 ± 0.56 a | 17.7 ± 0.27b |
| Benzoic acid                                    | n.d.*          | 60.6 ± 2.14  |
| Not identified                                  | n.d.           | 3.66 ± 0.11  |
| Carvone                                         | 50.63 ± 0.27   | n.d.         |
| Dimethyl sulfide                                | n.d.           | 10.58 ± 0.33 |
| Disulfide dimethyl                              | n.d.           | 1.75 ± 0.02  |
| Cyclohexene, 1-methyl-4-(1-methylethenyl)-, (S) | 1.83 ± 0.06    | n.d.         |

\*n.d. – not detectable

Table S2. Relative area of volatile compounds in Bread and Meat samples

| Volatile compounds                               | Bread C       | Bread DSJ     | Meat C        | Meat DSJ      |
|--------------------------------------------------|---------------|---------------|---------------|---------------|
| Hexanal                                          | 0.19 ± 0.01c  | 0.09 ± 0.00d  | 28.21 ± 0.98a | 12.93 ± 0.27b |
| 3-furaldehyde                                    | 2.83 ± 0.07d  | 5.16 ± 0.16c  | 31.93 ± 1.22a | 10.2 ± 0.38b  |
| Benzaldehyde                                     | 29.15 ± 0.64b | 33.6 ± 1.42a  | 14.61 ± 0.06d | 19.14 ± 0.10c |
| 2-cyclohexen-1-one, 2methyl-5-(2-methyloxiranyl) | 0.6 ± 0.02b   | 11.49 ± 0.34a | n.d.          | n.d.          |
| Benzyl alcohol                                   | 27.02 ± 1.30a | 20.07 ± 0.74b | 12.73 ± 0.38d | 19.63 ± 0.22c |
| Phenylethyl alcohol                              | 24.13 ± 0.50a | 6.39 ± 0.10b  | n.d.          | n.d.          |
| n-decanoic acid                                  | 6.65 ± 0.12b  | 6.87 ± 0.10b  | 5.43 ± 0.23c  | 14.25 ± 0.21a |
| Decyltrifluoroacetate                            | 4.51 ± 0.18b  | 9.55 ± 0.11a  | n.d.          | n.d.          |
| Undecanoic acid                                  | 4.92 ± 0.14c  | 6.79 ± 0.09b  | 3.22 ± 0.06d  | 7.81 ± 0.31a  |

\*n.d. – not detectable
